# Supplementary material
Source: PubMed Central journal article supplement (PMC5839097)

**Figure E1**

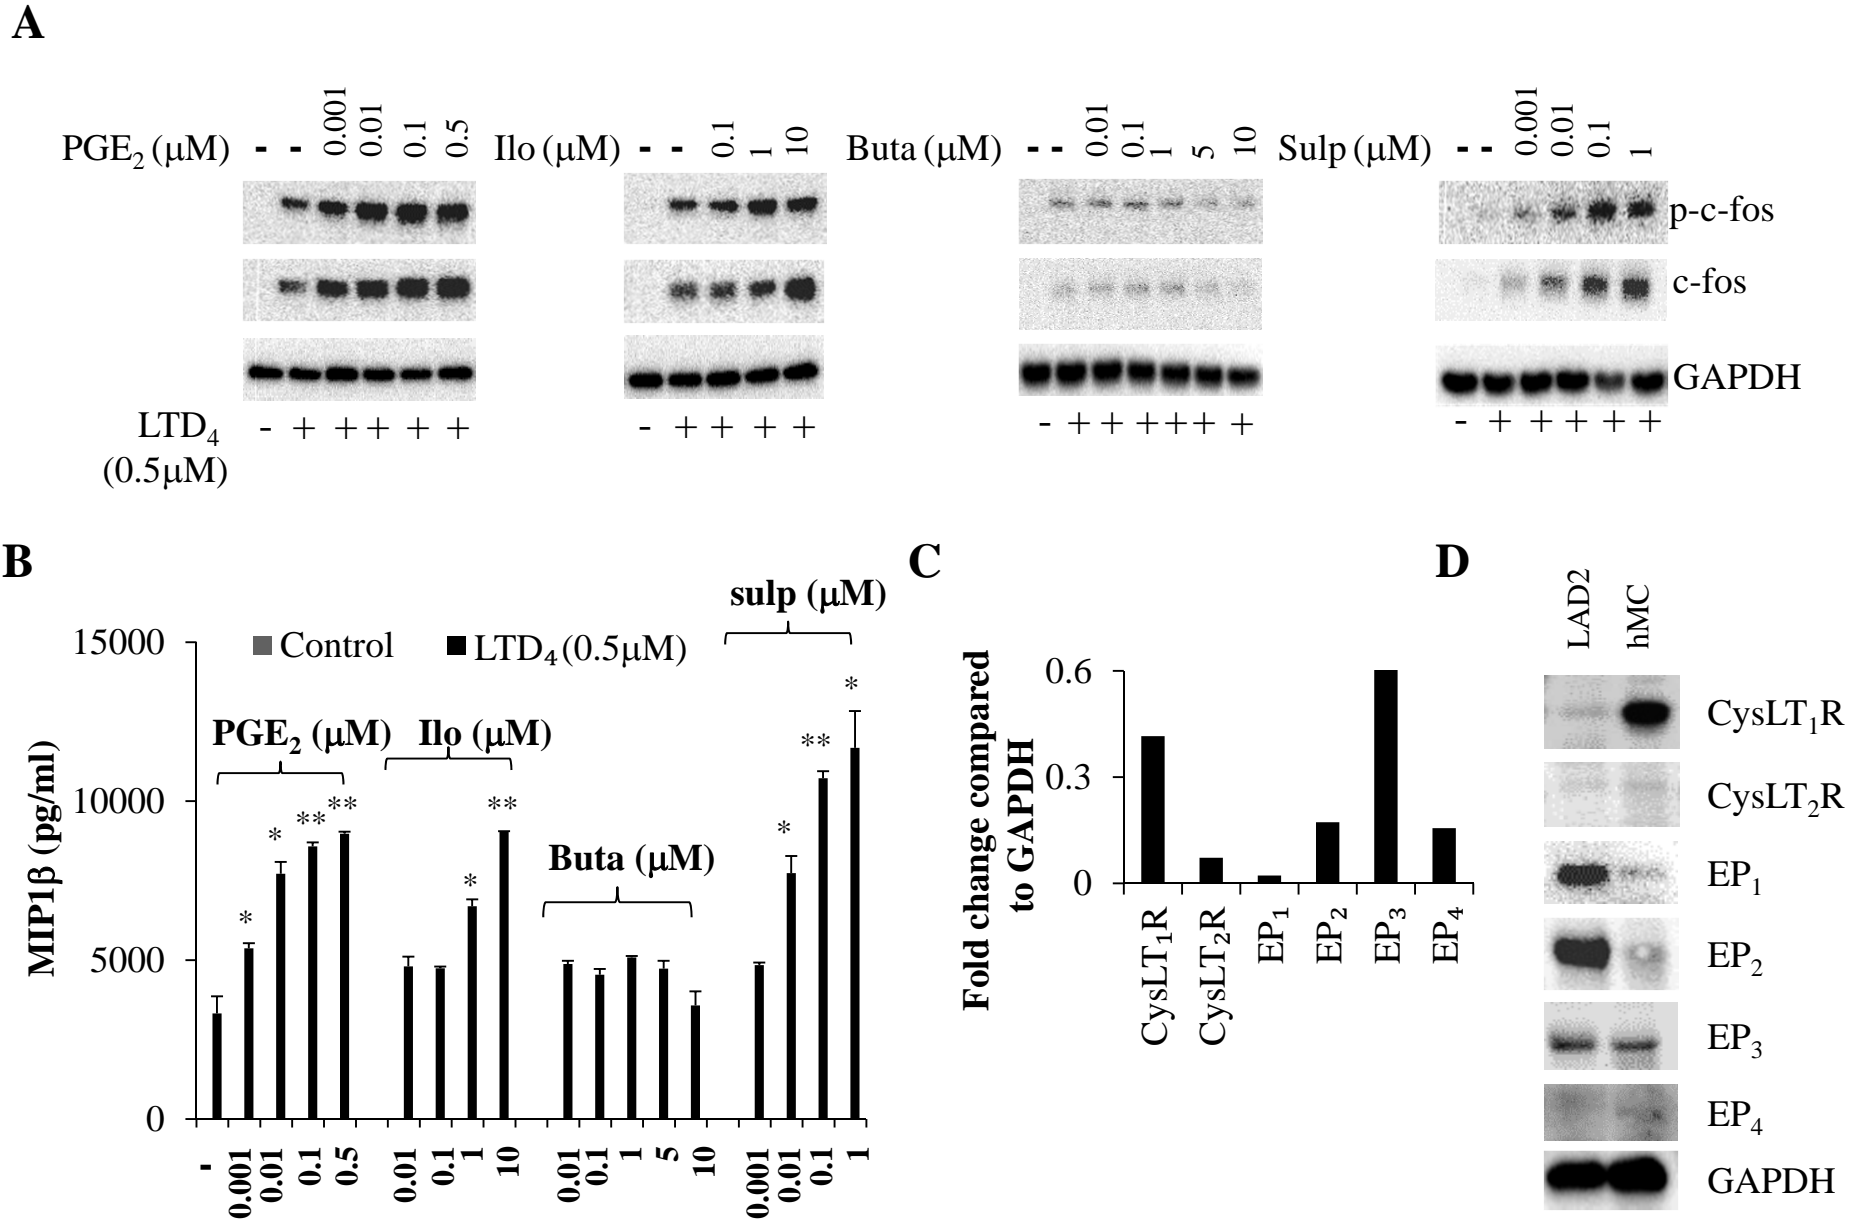

Supplement: NIHMS944769-supplement-Supplemental_Fig__1.pdf [file NIHMS944769-supplement-Supplemental_Fig__1.pdf]

**Figure E2**

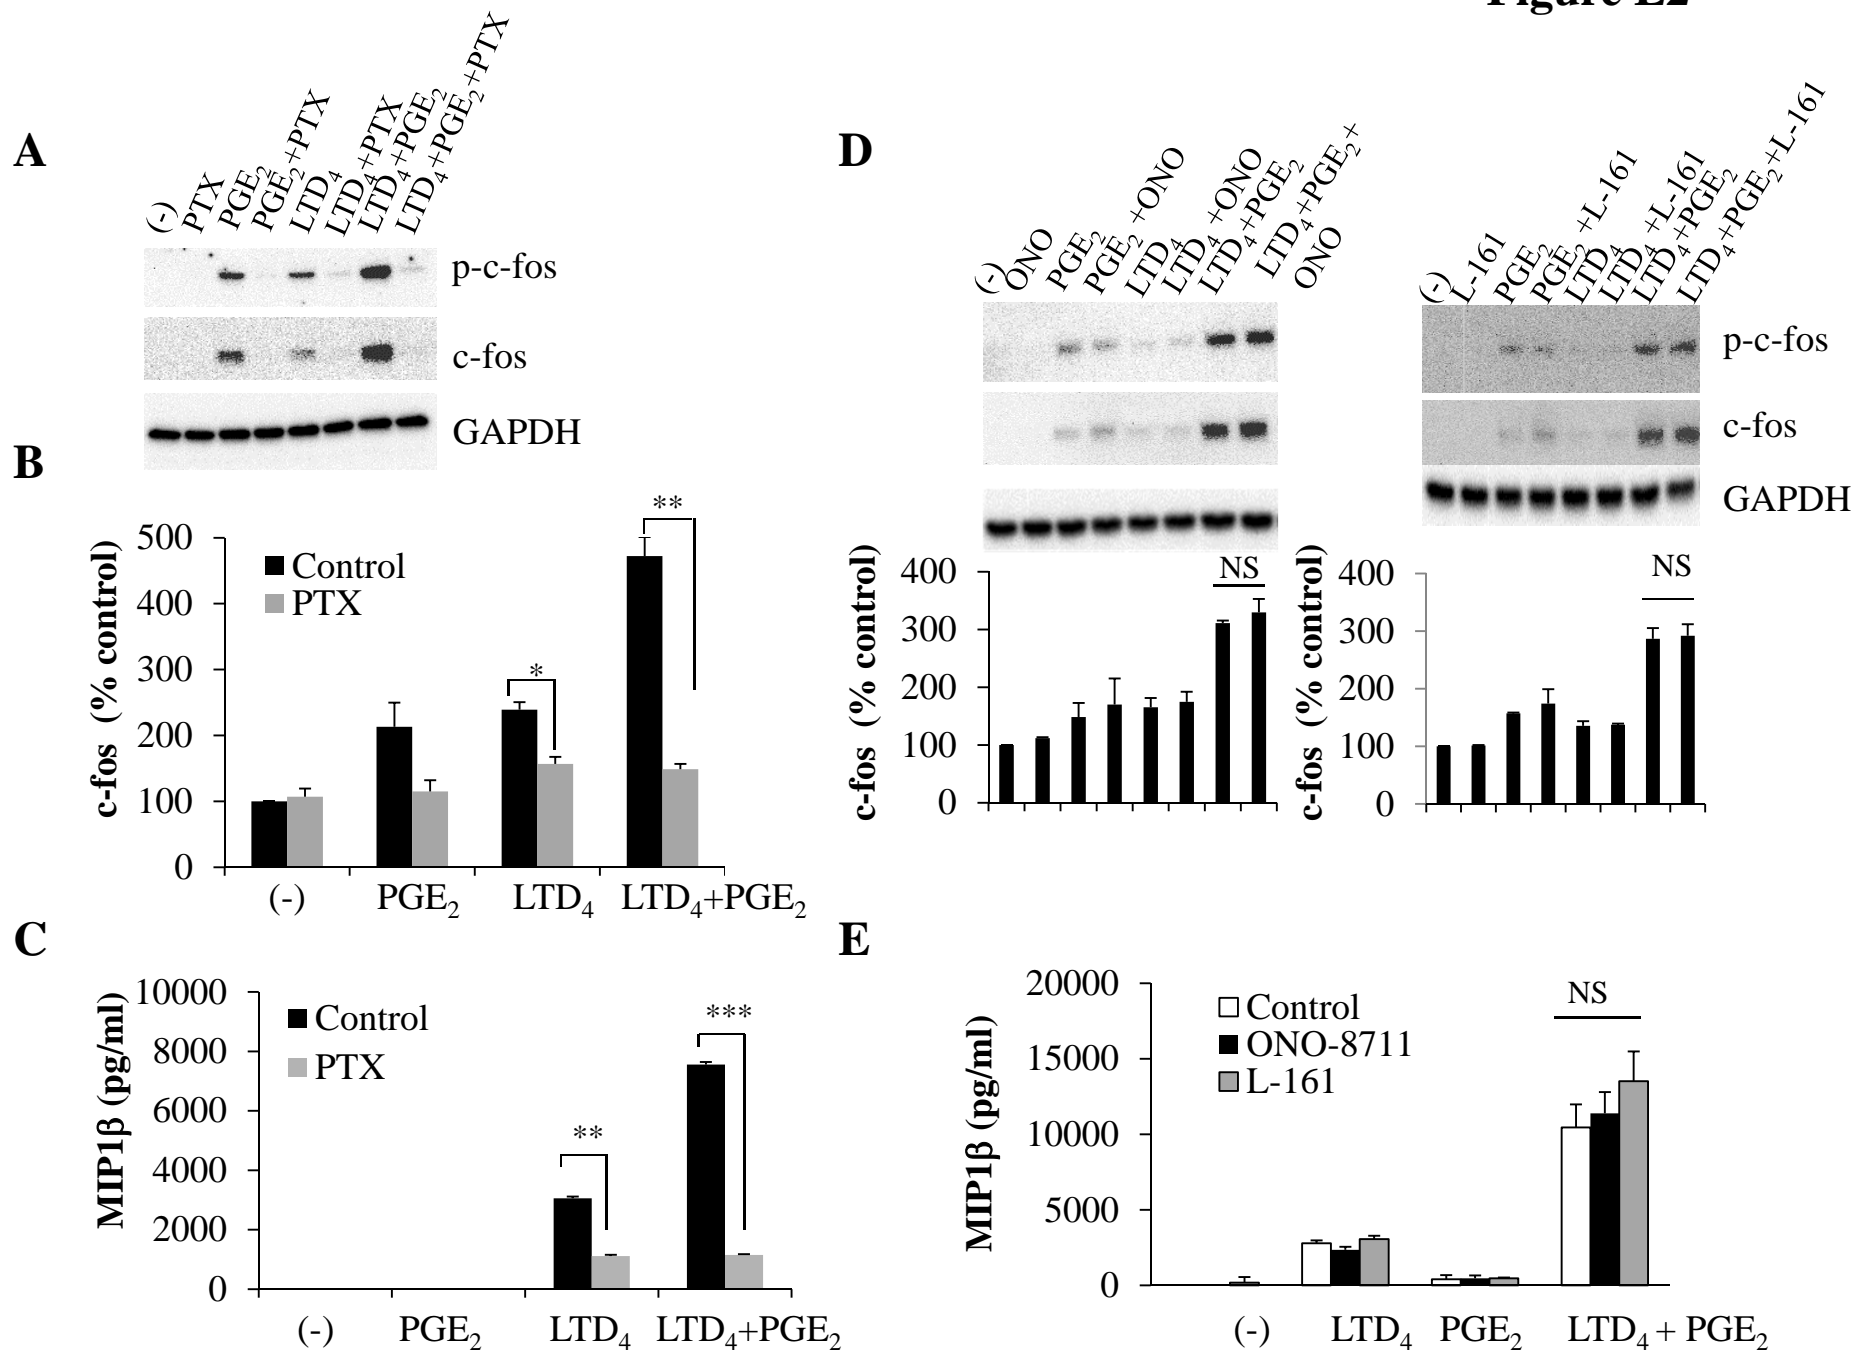

Supplement: NIHMS944769-supplement-Supplemental_Fig__2.pdf [file NIHMS944769-supplement-Supplemental_Fig__2.pdf]

**Figure E3**

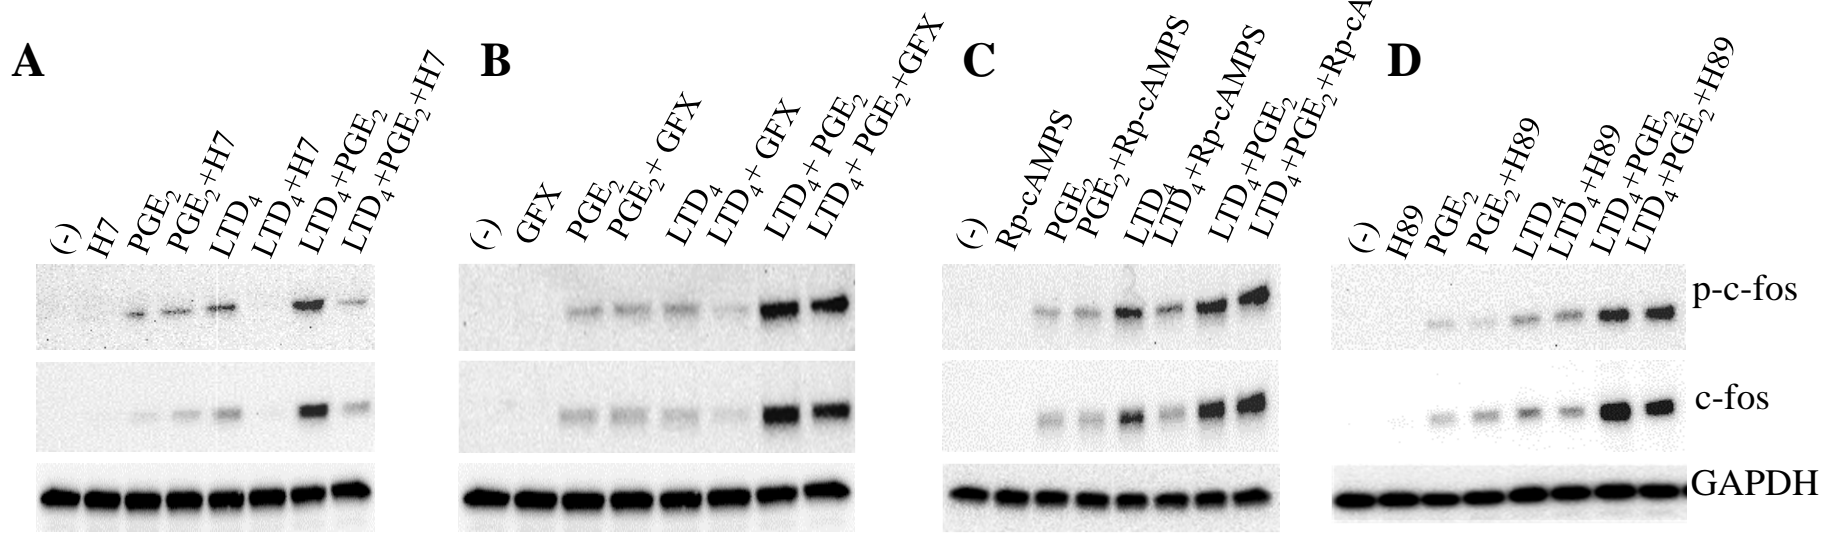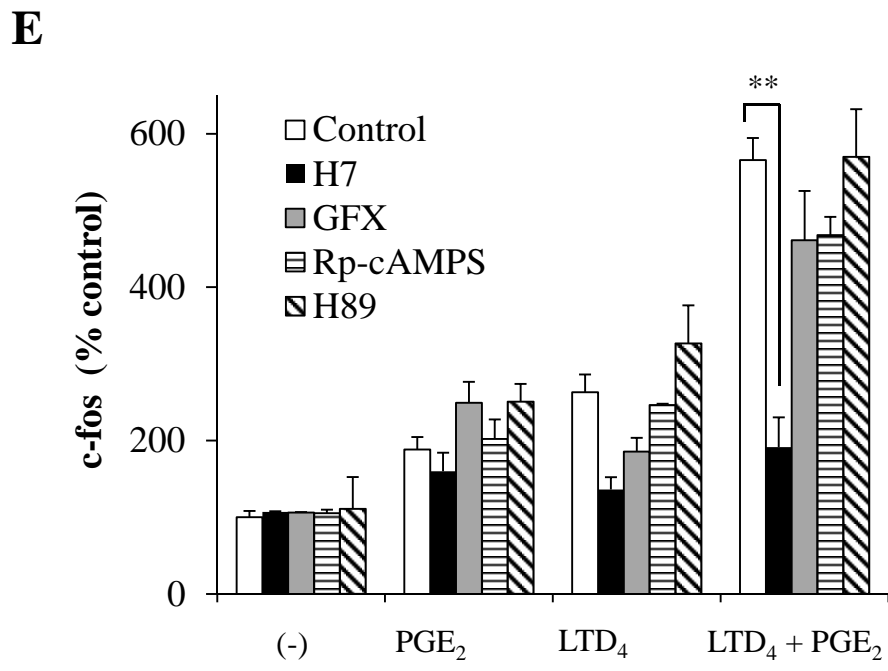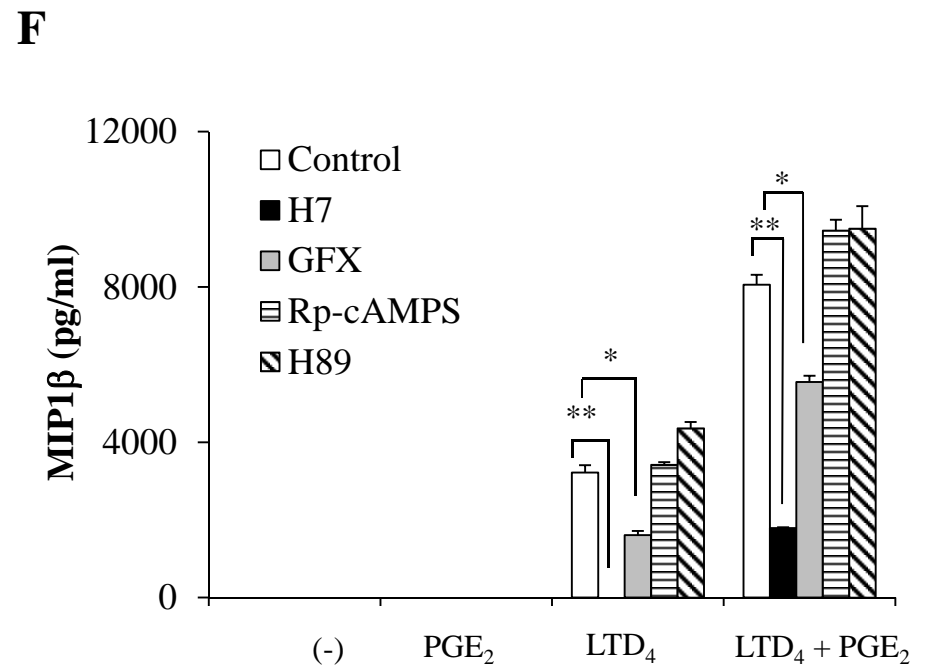

Supplement: NIHMS944769-supplement-Supplemental_Fig__3.pdf [file NIHMS944769-supplement-Supplemental_Fig__3.pdf]

**Figure E4**

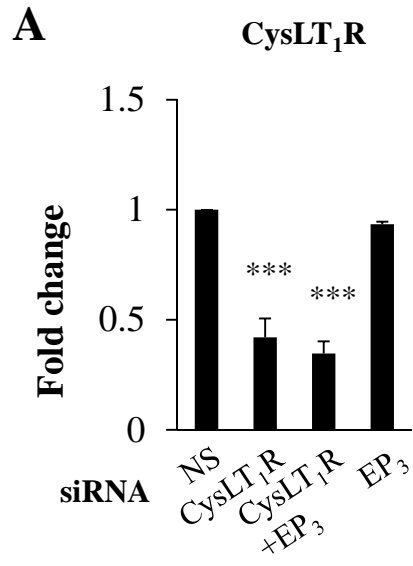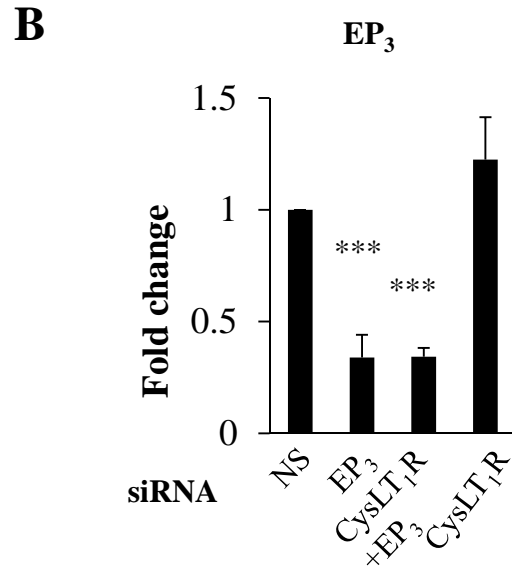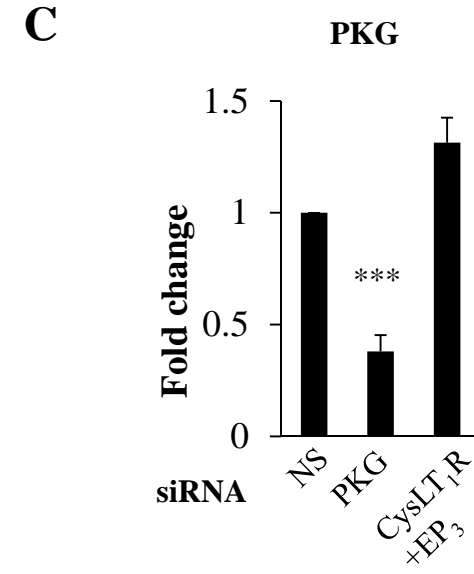

Supplement: NIHMS944769-supplement-Supplemental_Fig__4.pdf [file NIHMS944769-supplement-Supplemental_Fig__4.pdf]
